# Supplementary material for: Follow #eHealth2011: Measuring the Role and Effectiveness of Online and Social Media in Increasing the Outreach of a Scientific Conference
Source: PubMed Central journal article supplement (PMC4971392; doi:10.2196/jmir.4480), 2016-07-19
Supplement: jmir_v18i7e191_app1.pdf [file jmir_v18i7e191_app1.pdf]

## Multimedia Appendix

### 1. Comparison of traditional and new impact measures

| Traditional impact measures                                                                                                                                   | New impact measures                                                                                                                                                                                                                                                                                |
|---------------------------------------------------------------------------------------------------------------------------------------------------------------|----------------------------------------------------------------------------------------------------------------------------------------------------------------------------------------------------------------------------------------------------------------------------------------------------|
| E-Mail: number of emails sent/forwarded                                                                                                                       | Twitter: official conference account <ul style="list-style-type: none"> <li>• number of followers</li> <li>• no. of retweets</li> <li>• no. of favourites</li> <li>• no. of users receiving retweets</li> <li>• no. of mentions of account name</li> </ul>                                         |
| Proceedings: number of: <ul style="list-style-type: none"> <li>• citations of papers</li> <li>• downloads of papers</li> <li>• sold printed copies</li> </ul> | Twitter: external engagement - hashtag use: <ul style="list-style-type: none"> <li>• number of followers of any user who mentions the hashtag</li> <li>• no. of retweets</li> <li>• no. of mentions of hashtags</li> <li>• no. of favourites</li> <li>• no. of users receiving retweets</li> </ul> |
|                                                                                                                                                               | Flickr: number of views of posters                                                                                                                                                                                                                                                                 |
| Conference: number of participants                                                                                                                            | Liveblog: number of <ul style="list-style-type: none"> <li>• people who posted questions from outside of the event</li> <li>• real time online views</li> </ul>                                                                                                                                    |
| Website: number of page visits                                                                                                                                | Facebook: number of page visits, likes, posts                                                                                                                                                                                                                                                      |
