# Supplementary material for: Follow #eHealth2011: Measuring the Role and Effectiveness of Online and Social Media in Increasing the Outreach of a Scientific Conference
Source: PubMed Central journal article supplement (PMC4971392; doi:10.2196/jmir.4480), 2016-07-19
Supplement: jmir_v18i7e191_app3.pdf [file jmir_v18i7e191_app3.pdf]

## Multimedia Appendix

### 3. Promotion timeline of the eHealth 2011 conference

|                       | Date                                                                                     | Activity                                                                                                                                                         |
|-----------------------|------------------------------------------------------------------------------------------|------------------------------------------------------------------------------------------------------------------------------------------------------------------|
| <b>Phase</b>          |                                                                                          |                                                                                                                                                                  |
| Setup                 | 10 May                                                                                   | Call-for-Papers (CFP) sent to email lists; set up Twitter account and Face- book page; posted CFP and announced official Twitter hashtag                         |
|                       | 12 May                                                                                   | Started to post news messages related to conference's topics on Twitter and Facebook                                                                             |
|                       | 20 May                                                                                   | Twitter stream widget added to official website                                                                                                                  |
|                       | 27 May                                                                                   | 2nd CFP sent to email lists                                                                                                                                      |
| Active Promotion      | 1 June                                                                                   | Started to follow people on Twitter                                                                                                                              |
|                       | 6 June                                                                                   | Started Twitter promotion (2 tweets per day asking for submissions)<br>Announced CFP deadline on Twitter and by email                                            |
|                       | 21 June                                                                                  | Announced extended CFP deadline on Twitter and email                                                                                                             |
|                       | 28 June                                                                                  | Sporadically tweeting and retweeting ehealth-related news (during the week)                                                                                      |
|                       | 13 July                                                                                  | From this date tweets were mainly focussed on conference news (reviewing completed, program online, etc.); retweeting of other news messages was stopped/reduced |
|                       | 19 July                                                                                  | Started to announce submission deadline for posters and demos                                                                                                    |
|                       | 2 Aug                                                                                    | Announced deadline extension for posters and demos<br>Registration was opened, venue was confirmed                                                               |
|                       | 25 Aug                                                                                   | Started to ask on Twitter for questions to be discussed at the conference panel                                                                                  |
|                       | 14 Sep                                                                                   | Decided for now to stop asking for questions for the panel due to lack of response, and to ask again nearer to the time of the conference                        |
|                       | 28 Sep                                                                                   | Created the Flickr group (later a Flickr gallery) for poster authors to upload images                                                                            |
| 29 Sep                | Sent reminders to register for conference, sporadically retweeting ehealth- related news |                                                                                                                                                                  |
| 2 Nov                 |                                                                                          |                                                                                                                                                                  |
| Last Minute Promotion | 13 Nov                                                                                   | Announced the lineup of invited speakers                                                                                                                         |
|                       | 15 Nov                                                                                   | Created the live blog                                                                                                                                            |
|                       | 16-17 Nov                                                                                | Asked again on Twitter for panel questions; announced live blog                                                                                                  |
| Actual Event          | 21-23 Nov                                                                                | Conference (live blogging / tweeting)                                                                                                                            |
| Post Event            | 24 Nov - 5 Dec                                                                           | Post event communication                                                                                                                                         |
